# Supplementary material for: Orange-emitting N-doped carbon dots as fluorescent and colorimetric dual-mode probes for nitrite detection and cellular imaging
Source: Royal Society of Chemistry journal article supplement (doi:10.1039/c9tb02934f), 2020-01-01
Supplement: c9tb02934f1.pdf [file c9tb02934f1.pdf]

## **Electronic Supplementary Information**

# **Orange emission N doped carbon dots as a fluorescent and colorimetric dual-mode probe for nitrite detection and cellular imaging**

Jing Jia, Wenjing Lu, Lin Li, Yifang Gao, Yuan Jiao, Hui Han,

Chuan Dong, and Shaomin Shuang \*

*College of Chemistry and Chemical Engineering, and Institute of Environmental*

*Science, Shanxi University, Taiyuan, 030006, China*

*\*: Corresponding author: Shaomin Shuang*

Email address: [smshuang@sxu.edu.cn](mailto:smshuang@sxu.edu.cn)

Fax: +86-351-7011688

Tel: +86-351-7018842

## EXPERIMENTAL SECTION

**Instrumentation and Characterization.** Transmission electron microscopy (TEM) observations were carried out on a JEM-2100 instrument (JEOL Ltd., Japan). Atomic force microscope (AFM) image was recorded on Multimode 8. Fourier transform infrared spectra (FTIR) were obtained on a Bruker Tensor II FTIR spectrometer (Bremen, Germany) with the KBr pellet technique. The X-ray photoelectron spectra (XPS) of dried N-CDs powder were acquired on an AXIS ULTRA DLD X-ray photoelectron spectrometer (Kratos, Tokyo, Japan). The UV-vis absorption and fluorescence spectrum were acquired on UV-2910 spectrophotometer (Hitachi, Japan) and F-4500 fluorescence spectrophotometer (Hitachi, Japan), respectively. Dynamic light scattering were measured by a Zetasizer Nano ZS90 instrument (Malvern, UK). Cellular imaging was carried out using confocal laser fluorescence microscopy (LSM-880).

**Quantum yield measurement.** The fluorescence quantum yield of the N-CDs was determined by using Rhodamine B (QY= 0.89) in ethanol as a reference based on the following equation (1):

$$\Phi = \Phi_R ( \text{Grad} / \text{Grad}_R ) (\eta^2 / \eta_R^2 ) \quad (1)$$

Where  $\Phi$  represents the quantum yield, Grad is the gradient from the plot of integrated fluorescence intensity against absorbance, and  $\eta$  is the refractive index of the solvent. The subscript R stands for reference to Rhodamine B. To prevent the re-absorption effect, the absorbances of the N-CDs and Rhodamine B solutions were kept below 0.10 at the excitation wavelength of 525 nm.

**Cytotoxicity assay.** The cytotoxicity of N-CDs in A549 cells was assessed by the standard MTT assay. Briefly, 100  $\mu\text{L}$  of A549 cells were seeded in a 96-well plate with a density of  $1 \times 10^4$  cells per well and allowed to adhere overnight. After an incubation of 24 h at 37 °C, the culture medium was then changed with fresh Dulbecco's modified Eagle's medium (DMEM) containing various concentrations of the N-CDs (0 to 0.90  $\text{mg}\cdot\text{mL}^{-1}$ ) for another 24 h. Then the culture medium was removed, 20  $\mu\text{L}$  of MTT (5  $\text{mg}\cdot\text{mL}^{-1}$ ) was added to each well. After additional 4 h

incubation, 100  $\mu\text{L}$  of DMSO was added into each well to dissolve MTT. The optical density (OD) of the mixture was measured at 600 nm with a SunRise microplate reader (Tecan Austria GmbH, Grödig, Austria). The cell viability was estimated by Equation (2).

$$\text{Cell viability (\%)} = \frac{OD_{\text{treated}}}{OD_{\text{control}}} \times 100\% \quad (2)$$

where  $OD_{\text{control}}$  and  $OD_{\text{treated}}$  were obtained in the absence and presence of N-CDs, respectively.

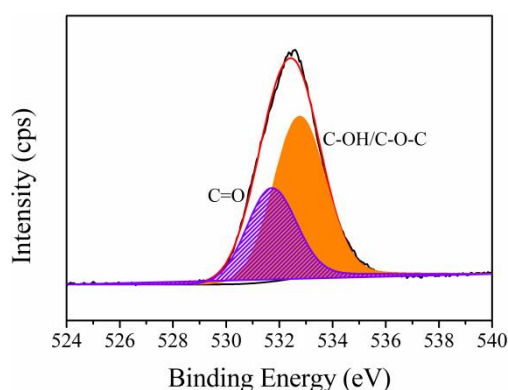

**Fig. S1** O1s high-resolution XPS spectra of the N-CDs.

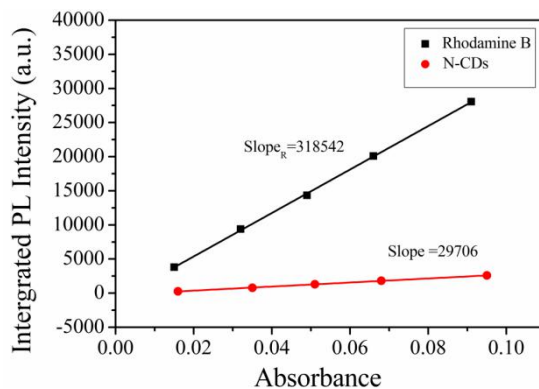

|               | Rhodamine B |         |          |          |          | N-CDs  |        |         |         |         |
|---------------|-------------|---------|----------|----------|----------|--------|--------|---------|---------|---------|
| Abs           | 0.015       | 0.032   | 0.049    | 0.066    | 0.091    | 0.016  | 0.035  | 0.051   | 0.068   | 0.095   |
| Integrated PL | 3800.47     | 9374.59 | 14327.31 | 20089.26 | 28054.33 | 272.46 | 764.82 | 1285.79 | 1791.38 | 1791.38 |
| Slope         | 318542      |         |          |          |          | 29706  |        |         |         |         |
| QY            | 89%         |         |          |          |          | 8.3%   |        |         |         |         |

**Fig.S2** Plots of integrated PL intensity against absorbance of Rhodamine B and

N-CDs at  $\lambda_{\text{ex}}$  of 525 nm and relevant data.

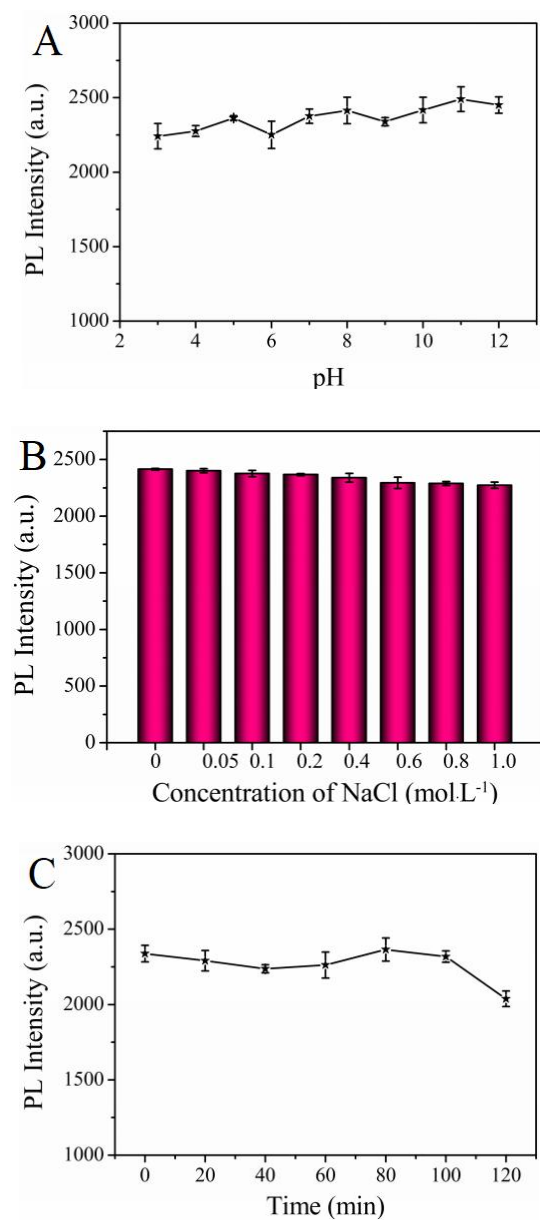

**Fig.S3** Effect of (A) pH , (B) ionic strength and (C) time intervals of irradiation with xenon arc light on the PL intensity at 600 nm of N-CDs.

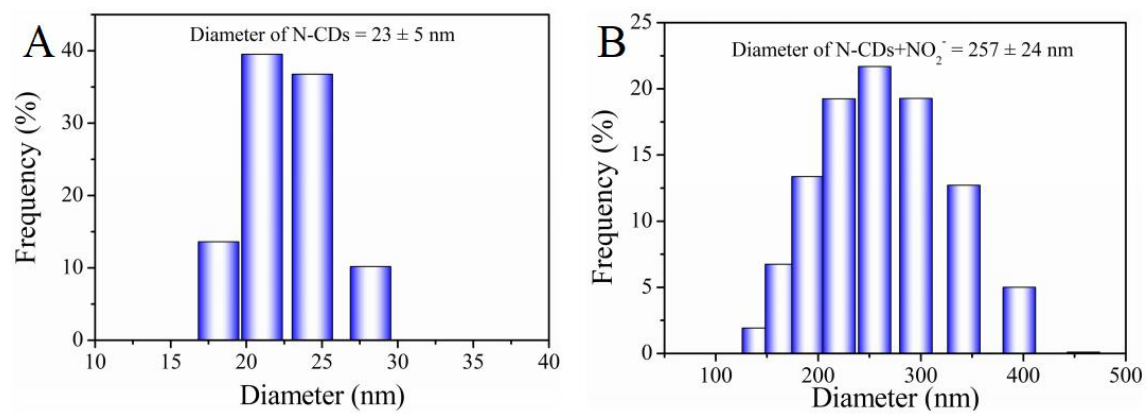

**Fig.S4** Dynamic Light Scattering (DLS) measurements of (A) N-CDs and (B) N-CDs + NO<sub>2</sub><sup>-</sup>

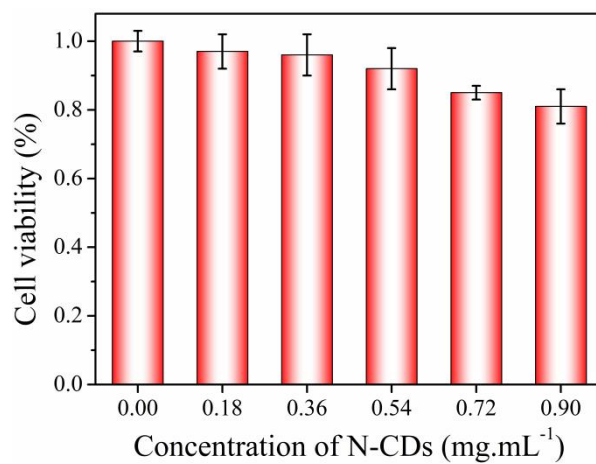

**Fig.S5** Cell viability values (%) estimated by MTT proliferation tests versus incubation concentrations of N-CDs at 37 °C for 24 h.
